# Supplementary material for: Validation of a chloroquine-induced cell death mechanism for clinical use against malaria
Source: PubMed Central journal article supplement — Cell Death Dis. 2014 Jun 26;5(6):e1305–. doi: 10.1038/cddis.2014.265 (PMC4611737; doi:10.1038/cddis.2014.265), 2014-06-26
Supplement: cddis2014265x1.pdf [file cddis2014265x1.pdf]

**Figure S1.**

| Strain/Isolate | N | Assay   | P-values compared to Veh Ctrl of Each Strain/Isolate |                |
|----------------|---|---------|------------------------------------------------------|----------------|
|                |   |         | [CQ] = 3750 nM                                       | [CQ] = 7500 nM |
| 3D7            | 3 | JC1     | <0.001                                               | <0.001         |
|                |   | Hoechst | <0.001                                               | <0.001         |
| K1             | 3 | JC1     | <0.001                                               | <0.001         |
|                |   | Hoechst | <0.01                                                | <0.01          |
| Dd2            | 3 | JC1     | <0.001                                               | <0.001         |
|                |   | Hoechst | <0.001                                               | <0.001         |
| HB3            | 3 | JC1     | <0.001                                               | <0.001         |
|                |   | Hoechst | <0.01                                                | <0.01          |
| CS2            | 4 | JC1     | <0.001                                               | <0.001         |
|                |   | Hoechst | <0.001                                               | <0.01          |
| T9/94          | 3 | JC1     | <0.001                                               | <0.001         |
|                |   | Hoechst | <0.01                                                | <0.01          |
| SMRU0233       | 5 | JC1     | <0.001                                               | <0.001         |
|                |   | Hoechst | <0.05                                                | <0.05          |
| SMRU0270       | 5 | JC1     | <0.001                                               | <0.001         |
|                |   | Hoechst | <0.05                                                | <0.05          |
| SMRU0272       | 3 | JC1     | <0.01                                                | <0.01          |
|                |   | Hoechst | N.S.                                                 | <0.01          |
| SMRU0279       | 3 | JC1     | <0.05                                                | <0.05          |
|                |   | Hoechst | <0.001                                               | <0.001         |
| SMRU1093       | 3 | JC1     | <0.001                                               | <0.001         |
|                |   | Hoechst | <0.001                                               | <0.001         |
| SMRU1116       | 3 | JC1     | <0.001                                               | <0.001         |
|                |   | Hoechst | <0.05                                                | <0.01          |

**Figure S2.**

| Figure Reference | Condition     | Comparisons   | P-value |
|------------------|---------------|---------------|---------|
| Figure 4A        | CQ = 0 nM     | 1hr v 3hr     | <0.05   |
|                  |               | 1hr v 6hr     | <0.01   |
|                  |               | 1hr v 9hr     | <0.01   |
|                  |               | 1hr v 18hr    | <0.01   |
|                  |               | 1hr v 24hr    | <0.01   |
|                  | CQ = 30 nM    | 1hr v 3hr     | N.S.    |
|                  |               | 1hr v 6hr     | <0.01   |
|                  |               | 1hr v 9hr     | <0.01   |
|                  |               | 1hr v 18hr    | <0.01   |
|                  |               | 1hr v 24hr    | <0.01   |
|                  | CQ = 3000 nM  | 1hr v 3hr     | <0.01   |
|                  |               | 1hr v 6hr     | <0.01   |
|                  |               | 1hr v 9hr     | <0.01   |
|                  |               | 1hr v 18hr    | <0.01   |
|                  | Time = 3hrs   | 0nM v 3000nM  | <0.01   |
|                  |               | 30nM v 3000nM | <0.01   |
|                  | Time = 6hrs   | 0nM v 3000nM  | <0.01   |
|                  |               | 30nM v 3000nM | <0.01   |
|                  | Time = 9hrs   | 0nM v 3000nM  | <0.01   |
|                  |               | 30nM v 3000nM | <0.01   |
|                  | Time = 18hrs  | 0nM v 3000nM  | <0.01   |
|                  |               | 30nM v 3000nM | <0.01   |
|                  | Time = 24hrs  | 0nM v 3000nM  | <0.01   |
|                  |               | 30nM v 3000nM | <0.01   |
| Figure 4B        | Time = 6hrs   | 0nM v 3000nM  | <0.05   |
|                  |               | 30nM v 3000nM | N.S.    |
|                  | Time = 9hrs   | 0nM v 3000nM  | <0.05   |
|                  |               | 30nM v 3000nM | ≤0.05   |
|                  | Time = 18hrs  | 0nM v 3000nM  | <0.05   |
|                  |               | 30nM v 3000nM | ≤0.05   |
| Time = 24hrs     | 0nM v 3000nM  | <0.05         |         |
|                  | 30nM v 3000nM | N.S.          |         |
| Figure 4C        | Time = 6hrs   | 0nM v 3000nM  | <0.05   |
|                  |               | 30nM v 3000nM | <0.05   |
|                  | Time = 9hrs   | 0nM v 3000nM  | <0.05   |
|                  |               | 30nM v 3000nM | <0.05   |
|                  | Time = 18hrs  | 0nM v 3000nM  | <0.05   |
|                  |               | 30nM v 3000nM | <0.05   |
| Time = 24hrs     | 0nM v 3000nM  | <0.05         |         |
|                  | 30nM v 3000nM | <0.05         |         |

| Figure Reference | [CQ] (nM) | # Mice |
|------------------|-----------|--------|
| Figure 4A        | 0         | N=5    |
|                  | 30        | N=5    |
|                  | 3000      | N=5    |
| Figure 4B        | 0         | N=4    |
|                  | 30        | N=3    |
|                  | 3000      | N=3    |
| Figure 4C        | 0         | N=4    |
|                  | 30        | N=3    |
|                  | 3000      | N=4    |

**Figure S3.**

| Figure Reference | Time | Comparison | P-value |
|------------------|------|------------|---------|
| Figure 6A        | 1hr  | 10 v 20    | <0.05   |
|                  |      | 10 v 50    | <0.01   |
|                  |      | 20 v 50    | <0.01   |
|                  | 4hr  | 10 v 20    | N.S.    |
|                  |      | 10 v 50    | <0.01   |
|                  |      | 20 v 50    | <0.01   |
| Figure 6B        | 1hr  | 10 v 20    | N.S.    |
|                  |      | 10 v 50    | <0.05   |
|                  |      | 20 v 50    | <0.05   |
|                  | 4hr  | 10 v 20    | N.S.    |
|                  |      | 10 v 50    | <0.05   |
|                  |      | 20 v 50    | <0.05   |
| Figure 6C        | 1hr  | 10 v 20    | <0.05   |
|                  |      | 10 v 50    | <0.01   |
|                  |      | 20 v 50    | <0.05   |
|                  | 4hr  | 10 v 20    | <0.05   |
|                  |      | 10 v 50    | <0.01   |
|                  |      | 20 v 50    | <0.05   |

| Figure Reference | Time | CQ dose (mg/kg) | # mice |
|------------------|------|-----------------|--------|
| Figure 6A        | 1hr  | 10              | N=7    |
|                  |      | 20              | N=6    |
|                  |      | 50              | N=6    |
|                  | 4hr  | 10              | N=7    |
|                  |      | 20              | N=6    |
|                  |      | 50              | N=6    |
| Figure 6B        | 1hr  | 10              | N=4    |
|                  |      | 20              | N=3    |
|                  |      | 50              | N=3    |
|                  | 4hr  | 10              | N=4    |
|                  |      | 20              | N=4    |
|                  |      | 50              | N=4    |
| Figure 6C        | 1hr  | 10              | N=7    |
|                  |      | 20              | N=7    |
|                  |      | 50              | N=11   |
|                  | 4hr  | 10              | N=9    |
|                  |      | 20              | N=9    |
|                  |      | 50              | N=13   |

**Figure S4.**

| Figure Reference | Time | Comparison | P-value |
|------------------|------|------------|---------|
| Figure 6D        | 6hr  | 0 v 10     | N.S.    |
|                  |      | 0 v 20     | N.S.    |
|                  |      | 0 v 50     | <0.05   |
|                  | 9hr  | 0 v 10     | <0.05   |
|                  |      | 0 v 20     | ≤0.05   |
|                  |      | 0 v 50     | <0.05   |
|                  | 24hr | 0 v 10     | <0.05   |
|                  |      | 0 v 20     | ≤0.05   |
|                  |      | 0 v 50     | <0.05   |
| Figure 6E        | 6hr  | 0 v 10     | N.S.    |
|                  |      | 0 v 20     | N.S.    |
|                  |      | 0 v 50     | N.S.    |
|                  | 9hr  | 0 v 10     | N.S.    |
|                  |      | 0 v 20     | N.S.    |
|                  |      | 0 v 50     | N.S.    |
|                  | 24hr | 0 v 10     | N.S.    |
|                  |      | 0 v 20     | <0.05   |
|                  |      | 0 v 50     | <0.01   |

| Figure Reference | CQ dose(mg/kg) | # Mice |
|------------------|----------------|--------|
| Figure 6D        | 0              | N=5    |
|                  | 10             | N=4    |
|                  | 20             | N=4    |
|                  | 50             | N=4    |
| Figure 6E        | 0              | N=4    |
|                  | 10             | N=6    |
|                  | 20             | N=3    |
|                  | 50             | N=5    |
